# Supplementary material for: Effect of a Sub-Chronic Oral Exposure of Broccoli (Brassica oleracea L. Var. Italica) By-Products Flour on the Physiological Parameters of FVB/N Mice: A Pilot Study
Source: MDPI journal article supplement (doi:10.3390/foods11010120), 2022-01-04
Supplement: s1 [file s1]

## Supplementary Table S3

**Supplementary Table S3.** Glucosinolate contents (mmol kg<sup>-1</sup> DW) in broccoli plant parts (inflorescences, stems and leaves).

| Compounds                                      | Inflorescences           | Stems                    | Leaves                   |
|------------------------------------------------|--------------------------|--------------------------|--------------------------|
| Glucoiberin<br>3-Methylsulphinylpropyl         | 0.75 ± 0.01 <sup>A</sup> | 1.20 ± 0.09 <sup>B</sup> | 0.77 ± 0.02 <sup>A</sup> |
| Glucoraphanin<br>4-Methylsulphinylbutyl        | 11.22 ± 0.25             | 13.27 ± 1.01             | 12.23 ± 1.45             |
| <b>Total aliphatic GLS</b>                     | 11.97 ± 0.12             | 14.47 ± 1.12             | 13.00 ± 1.47             |
| 4-Hydroxyglucobrassicin                        | 0.33 ± 0.05 <sup>A</sup> | 0.59 ± 0.03 <sup>C</sup> | 0.45 ± 0.01 <sup>B</sup> |
| Glucobrassicin                                 | 5.21 ± 0.18 <sup>A</sup> | 1.75 ± 0.15 <sup>B</sup> | 5.23 ± 0.75 <sup>A</sup> |
| 4-Methoxyglucobrassicin<br>Indol-3-ylmethyl    | 1.13 ± 0.25              | 1.02 ± 0.03              | 1.11 ± 0.04              |
| Neoglucobrassicin<br>1-Methoxyindol-3-ylmethyl | 2.72 ± 0.41 <sup>A</sup> | 0.54 ± 0.09 <sup>B</sup> | 2.77 ± 1.10 <sup>A</sup> |
| <b>Total indolyl GLS</b>                       | 9.39 ± 0.13              | 3.90 ± 0.65              | 9.56 ± 1.27              |
| <b>Total Glucosinolates</b>                    | 21.36 ± 0.32             | 18.37 ± 0.89             | 22.56 ± 0.44             |

Data showed as Mean (n=3) ± SD. For each compound, different superscript uppercase letters indicate significant differences ( $p < 0.05$ ) between inflorescences, stems and leaves, according to Tukey's test. DW, dry weight; GLS, glucosinolates.
