# Supplementary material for: Effect of a Sub-Chronic Oral Exposure of Broccoli (Brassica oleracea L. Var. Italica) By-Products Flour on the Physiological Parameters of FVB/N Mice: A Pilot Study
Source: MDPI journal article supplement (doi:10.3390/foods11010120), 2022-01-04
Supplement: s1 [file s1]

Supplementary Table S2

Supplementary Table S2. Chromatographic and electrospray ionization conditions.

| Compound <sup>z</sup> | Rt (min) | Parent ion                                                              | Product ion                                                               | Dwell | F    | CE   | Cell Acc | Polarity |
|-----------------------|----------|-------------------------------------------------------------------------|---------------------------------------------------------------------------|-------|------|------|----------|----------|
|                       |          | ( <i>m/z</i> MS [M-H] <sup>-</sup> / <i>m/z</i> MS [M+H] <sup>+</sup> ) | ( <i>m/z</i> MS2 [M-H] <sup>-</sup> / <i>m/z</i> MS2 [M+H] <sup>+</sup> ) |       | (eV) | (eV) |          |          |
| SFN-NAC               | 1.108    | - / 341.0                                                               | - / 178.0                                                                 | 20    | 80   | 0    | 7        | Positive |
| SFN-CYS               | 0.702    | - / 299.0                                                               | - / 178.0                                                                 | 20    | 80   | 0    | 7        | Positive |
| DIM                   | 1.66     | - / 247.1                                                               | - / 105.0                                                                 | 20    | 70   | 25   | 7        | Positive |
| Erucin                | 0.444    | 141.1 / -                                                               | 59.0 / -                                                                  | 20    | 70   | 6    | 7        | Negative |
| SFN                   | 1.644    | - / 178.0                                                               | - / 114.0                                                                 | 20    | 75   | 4    | 7        | Positive |
| Iberin                | 1.542    | - / 164.0                                                               | - / 105.0                                                                 | 20    | 90   | 6    | 7        | Positive |
| I3C                   | 1.284    | - / 148.1                                                               | - / 77.1                                                                  | 20    | 70   | 25   | 7        | Positive |
| SFN-GSH               | 1.174    | - / 485.0                                                               | - / 178.0                                                                 | 20    | 115  | 0    | 7        | Positive |
| GB                    | 1.27     | 447.2 / -                                                               | 97 / -                                                                    | 20    | 80   | 20   | 7        | Negative |
| GR                    | 0.626    | 438.0 / -                                                               | 196.0 / -                                                                 | 20    | 90   | 4    | 7        | Negative |
| GI                    | 0.648    | 421.9 / -                                                               | 357.7 / -                                                                 | 20    | 100  | 0    | 7        | Negative |
| GE                    | 1.211    | 420.0 / -                                                               | 97.1 / -                                                                  | 20    | 60   | 20   | 7        | Negative |

<sup>z</sup>SFN-NAC, Sulforaphane-*N*-acetyl-cysteine; SFN-CYS, Sulforaphane-cysteine; DIM, 3,3'-Diindolylmethane; SFN, Sulforaphane; I3C, indole-3-carbinol; SFN-GSH, Sulforaphane-glutathione; GB, Glucobrassicin; GR, Glucoraphanin; GI, Glucoiberin; GE, Glucoerucin; F, fragmentation energy; CE, collision energy.
