# Supplementary material for: Effect of a Sub-Chronic Oral Exposure of Broccoli (Brassica oleracea L. Var. Italica) By-Products Flour on the Physiological Parameters of FVB/N Mice: A Pilot Study
Source: MDPI journal article supplement (doi:10.3390/foods11010120), 2022-01-04
Supplement: s1 [file s1]

## Supplementary Figure S2

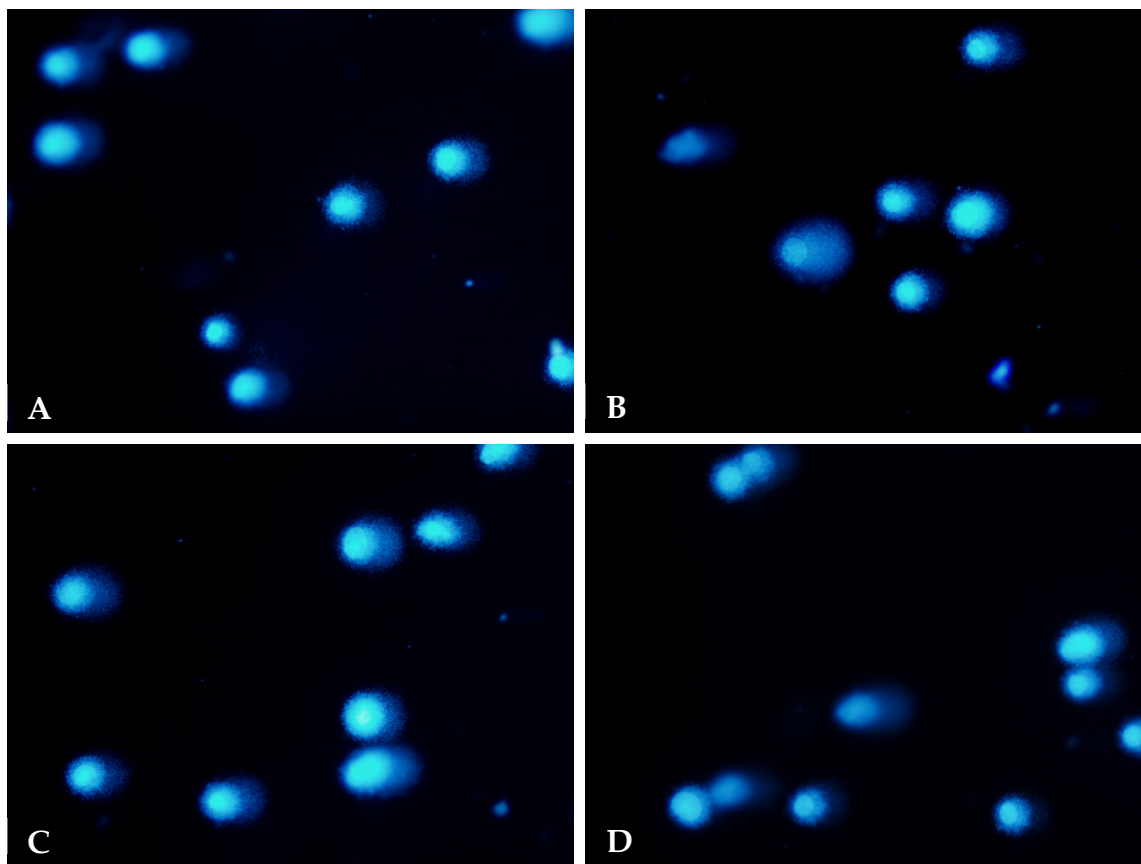

**Supplementary Figure S2.** DAPI (4',6-Diamidino-2-Phenylindole) stained comets (nucleoids) from mice fed with a normal chow (CTR), non-exposed (**A**) or exposed (**B**) to formamidopyrimidine DNA glycosylase (FPG), and mice fed with 6.7% (weight/weight) broccoli by-products flour (BF), non-exposed (**C**) or exposed (**D**) to FPG. All mice were sacrificed after 21 days of exposure. Comets were isolated from mice leucocytes and visualized in a fluorescence microscope (Olympus BX41 microscope; 400x magnification).
