# Supplementary material for: Effect of a Sub-Chronic Oral Exposure of Broccoli (Brassica oleracea L. Var. Italica) By-Products Flour on the Physiological Parameters of FVB/N Mice: A Pilot Study
Source: MDPI journal article supplement (doi:10.3390/foods11010120), 2022-01-04
Supplement: s1 [file s1]

**Supplementary Table S1**

**Supplementary Table S1.** Chromatographic and electrospray ionization conditions.

| Chromatographic conditions |                                            | Electrospray source conditions |      |
|----------------------------|--------------------------------------------|--------------------------------|------|
| Flow                       | 0.300                                      | Gas temperature (°C)           | 225  |
| Injection volume           | 10 µL                                      | Gas Flow (L/min)               | 8    |
| Solvent A                  | 13 mM ammonium acetate pH 7                | Nebulizer (psi)                | 30   |
| Solvent B                  | Acetonitrile/formic acid (99.99:0.01, v/v) | Seath Gas Heater (°C)          | 350  |
| Gradient                   |                                            | Seath Gas Flow (L)             | 10   |
|                            |                                            | Capillary (V)                  | 3500 |
| Time (min.)                | %B                                         | VCharging (eV)                 | 1250 |
| 0.20                       | 12.00                                      |                                |      |
| 0.21                       | 70.00                                      |                                |      |
| 1.00                       | 30.00                                      |                                |      |
| 1.01                       | 52.00                                      |                                |      |
| 2.50                       | 52.00                                      |                                |      |
| 4.00                       | 100.00                                     |                                |      |
| 7.00                       | 100.00                                     |                                |      |
| 80.00                      | 12.00                                      |                                |      |
