# Supplementary material for: Effect of a Sub-Chronic Oral Exposure of Broccoli (Brassica oleracea L. Var. Italica) By-Products Flour on the Physiological Parameters of FVB/N Mice: A Pilot Study
Source: MDPI journal article supplement (doi:10.3390/foods11010120), 2022-01-04
Supplement: s1 [file s1]

## Supplementary Figure S1

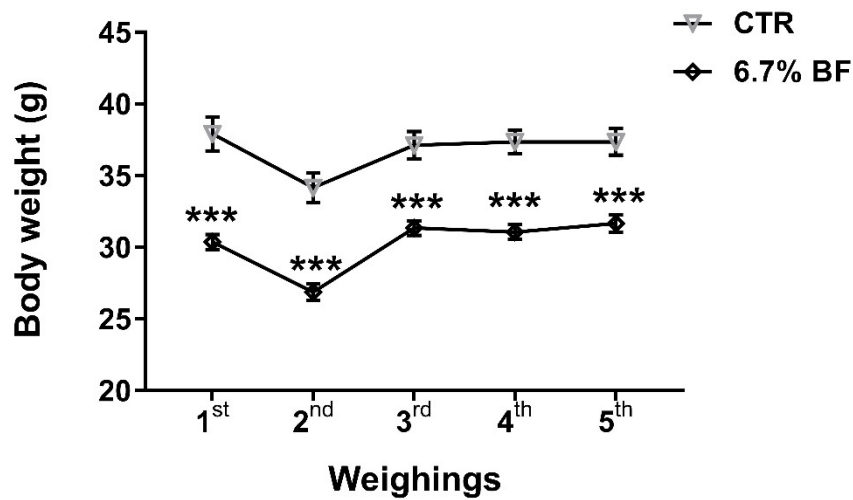

**Supplementary Figure S1.** Body weight variation during the study. Mice were fed a normal chow (CTR) or a diet with 6.7% (weight/weight) broccoli by-products flour (BF) and were sacrificed after 21 days. Mice were weighed before the start of experiment (1<sup>st</sup> weighing), after fasting (2<sup>nd</sup> weighing), 1 week (3<sup>rd</sup> weighing) and 2 weeks (4<sup>th</sup> weighing) after the start of experiment, and before euthanasia (5<sup>th</sup> weighing) at the end of the study. Data are expressed as mean  $\pm$  SEM (n=5). \*\*\* $p$  < 0.001, different from CTR for the same time point, according to Unpaired Student's t-test.
