# Supplementary material for: Effect of a Sub-Chronic Oral Exposure of Broccoli (Brassica oleracea L. Var. Italica) By-Products Flour on the Physiological Parameters of FVB/N Mice: A Pilot Study
Source: MDPI journal article supplement (doi:10.3390/foods11010120), 2022-01-04
Supplement: s1 [file s1]

### Supplementary Figure S3

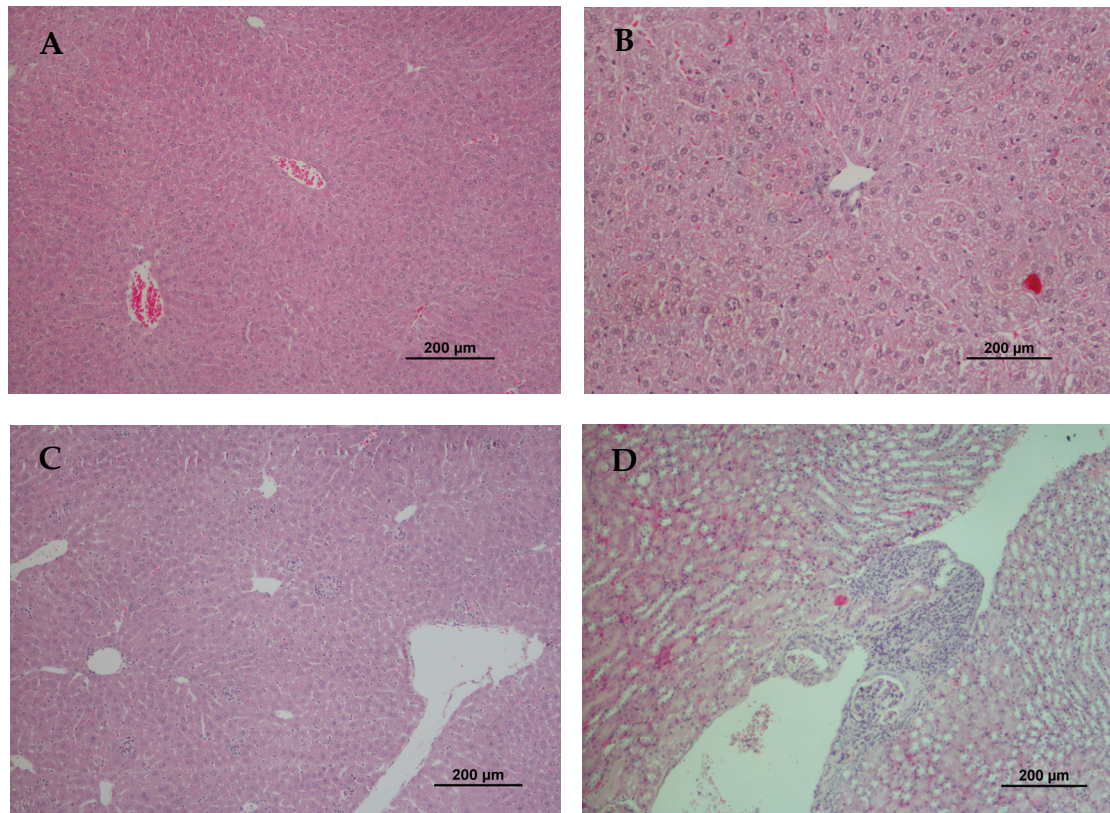

**Supplementary Figure S3.** Microscopic images (staining with hematoxylin and eosin) of liver and kidney sections from the different groups under study. **A)** liver displaying normal architecture from a mouse fed with 6.7% (weight/weight) broccoli by-products flour (BF); **B)** cellular tumefaction and focal hydropic degeneration visible at zone 3 in a different mouse fed with BF; **C)** multifocal inflammatory infiltrate (lymphocytes and macrophages) in an animal from the CTR group; **D)** interstitial chronic nephritis (lymphocytic infiltrate) from a CTR animal.
